# Supplementary material for: Inhibition of FTO attenuates Crohn’s Disease injury and inflammation by increasing BACH2 m6A modifications via YTHDF1-dependent mechanisms
Source: Research Square preprint supplement (doi:10.21203/rs.3.rs-7587364/v1), 2025-10-07

**Inhibition of FTO attenuates Crohn’s Disease injury and inflammation by increasing BACH2 m6A modifications via YTHDF1-dependent mechanisms**

Duo Ma2,#, Xingxing Zhang1,#**,** Yaling Hong1,#, Famin Zhang1, Cui Chang 1, Junjie Zhao1, Yumeng Wang1, Wenhu Liu 1, Qiao Mei3, Lu Zhou4,*, Mingming Liu1,*, Xinhua Liu1,*

1School of Pharmacy, Inflammation and Immune Mediated Diseases Laboratory of Anhui Province, Anhui Medical University, Hefei, 230032, P. R. China

2 Department of clinical pharmacology, the second affiliated hospital of Anhui Medical University, Hefei, 230601, P. R. China

3 Department of Gastroenterology, First Affiliated Hospital of Anhui Medical University, 230022, Hefei, China

4 School of Pharmacy, Fudan University, Shanghai 201203, China

**Catalogue**

[Fig S1. 2](#_Toc26046)

[Fig S2. 3](#_Toc29129)

[Fig S3. 4](#_Toc2656)

[Fig S4. 4](#_Toc19879)

[Fig S5. 5](#_Toc21282)

[Fig S6: 5](#_Toc12658)

[Table S1 6](#_Toc29738)

[Table S2-1: Mouse primer sequences 7](#_Toc21810)

[Table S2-2: Human primer sequences 8](#_Toc12284)

[Table S3: The clinical features of the patients 9](#_Toc31147)

[Table S4: The primers of siRNA transfection 9](#_Toc21352)

[Table S5: The shRNAs targeting human FTO in Stable Cell Line 10](#_Toc4866)

[Table S6: Antibodies in Flow cytometry 10](#_Toc23092)

[1](#_Toc27986)[H NMR of compound licochalcon B 12](#_Toc27986)

[Certificate of Analysis of compound licochalcon B 14](#_Toc18894)

[HPLC of compound licochalcon B 15](#_Toc17158)


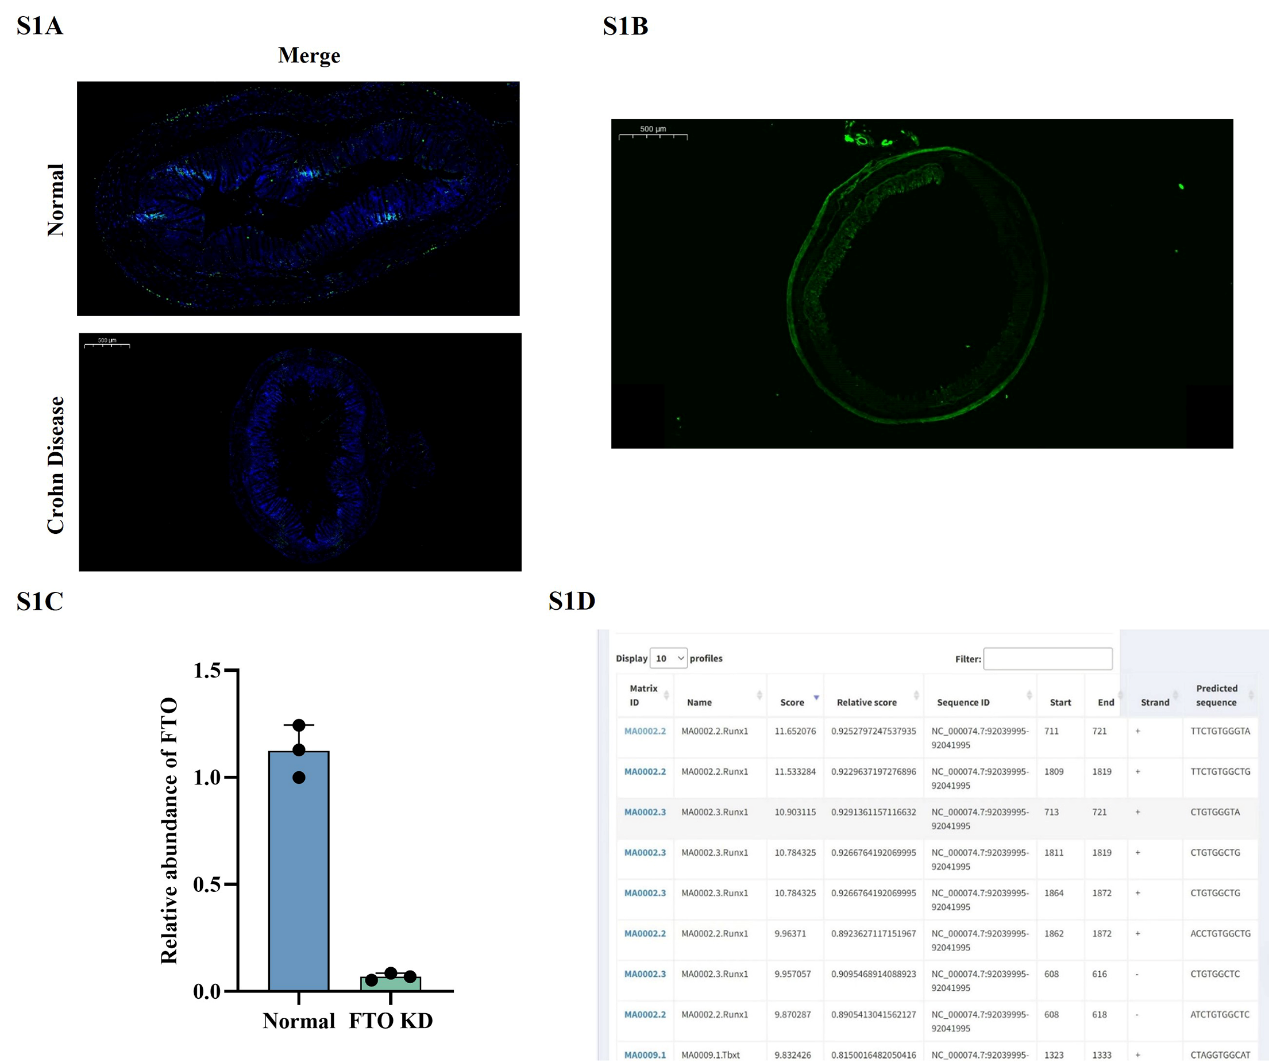


Fig S1. A: Representative Immunofluorescence staining pictures of FTO in TNBS-induced IBD. Full picture, Scale bars, 500 μm.

B: Immunofluorescence results were analyzed in mouse Colon of AAV9- packaged FTO knockdown. Full picture, Scale bars, 500 μm.

C. Real-time PCR analysis of FTO mRNA expression in mouse Colon of AAV9- packaged FTO knockdown.

D. predict the outcome of transcription factor binding sites in FTO promoter region using JASPAR database.


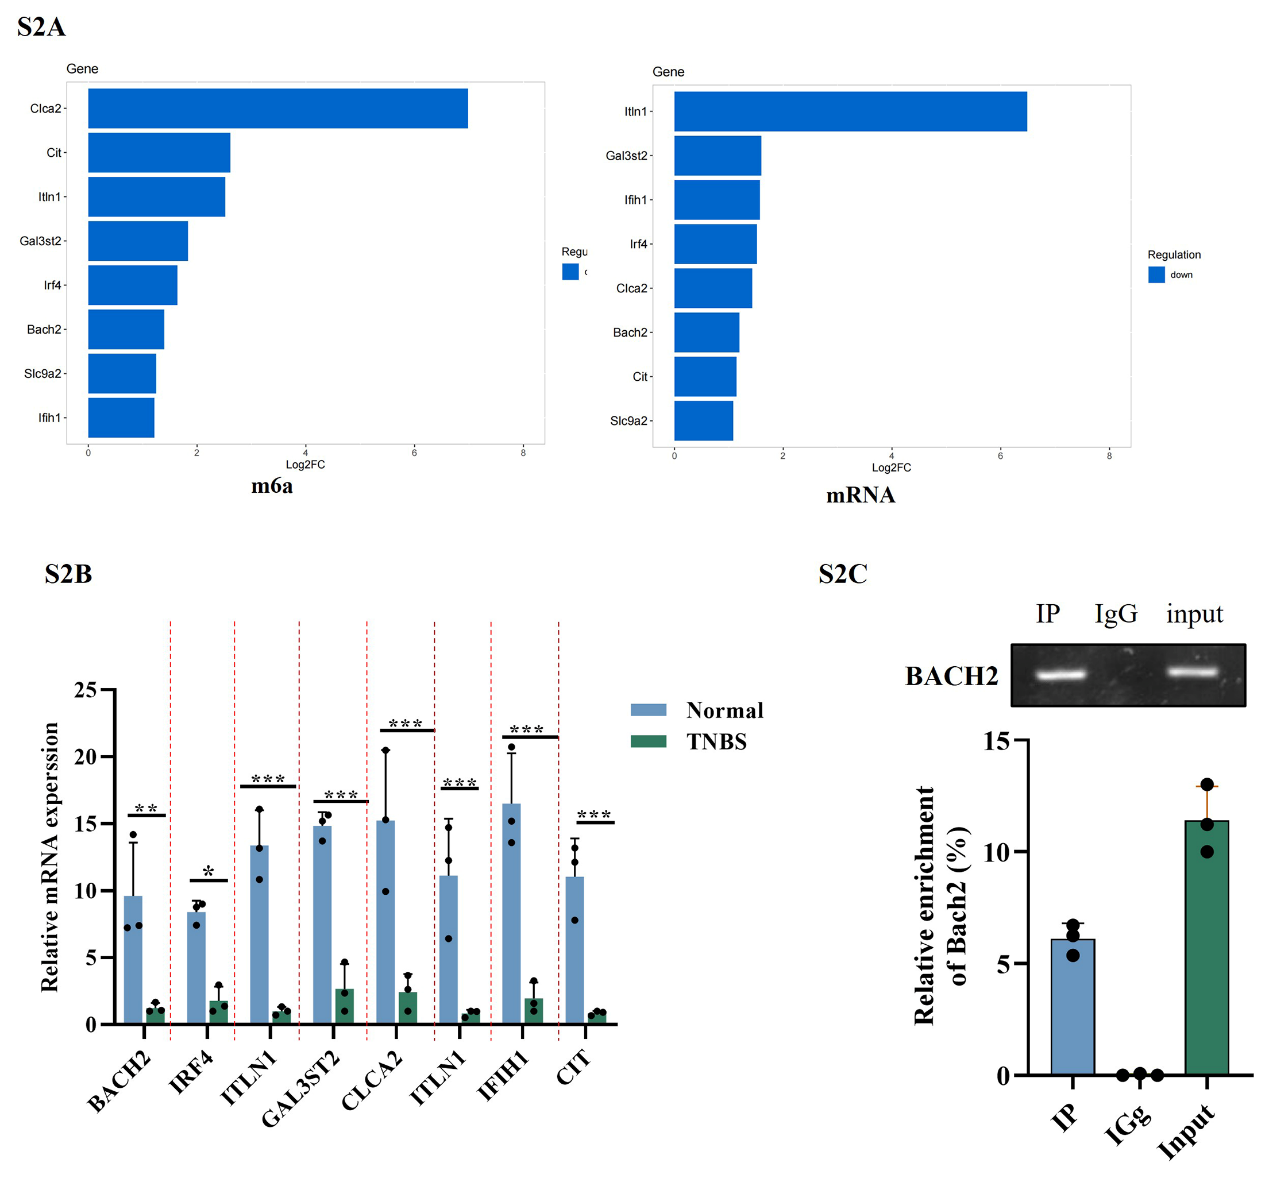


Fig S2. A: MeRIP-seq and RNA-seq analysis showing differentially expressed of eight genes in TNBS-induced IBD with controls.

B: The results of real-time PCR analysis of expressed of eight genes in TNBS-induced IBD with controls.

C: Agarose electrophoresis and real-time PCR analysis of RIP assays in HCT-116 cells showing the direct binding between the FTO protein and Bach2 mRNA. (n=3 biological replicates of mice, t test)

Data are means±SEM. **p*<0.05, ***p*<0.01, ****p*<0.001.


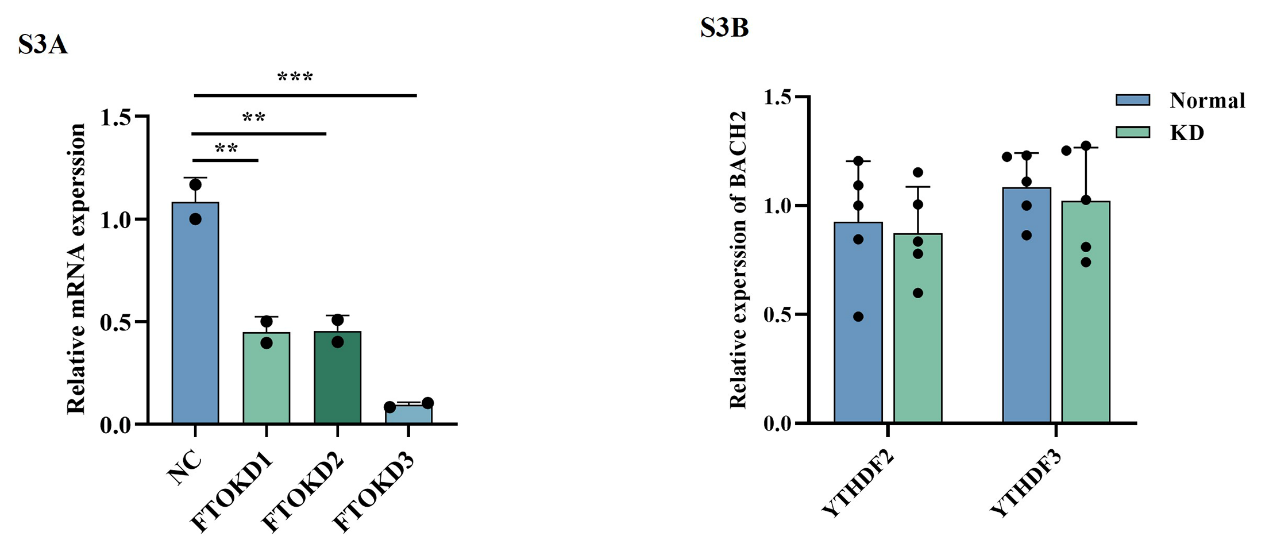


Fig S3. A: Real-time PCR analysis of FTO mRNA expression in Stable Cell Line (n=2 biological replicates of mice, *t* test).

B: Real-time PCR analysis of BACH2 mRNA expression in the YTHDF2 or YTHDF3 knockout in HCT-116 cells (n=5 biological replicates of mice, *t* test)

Data are means ± SEM. **p*<0.05, ***p*<0.01, ****p*<0.001.


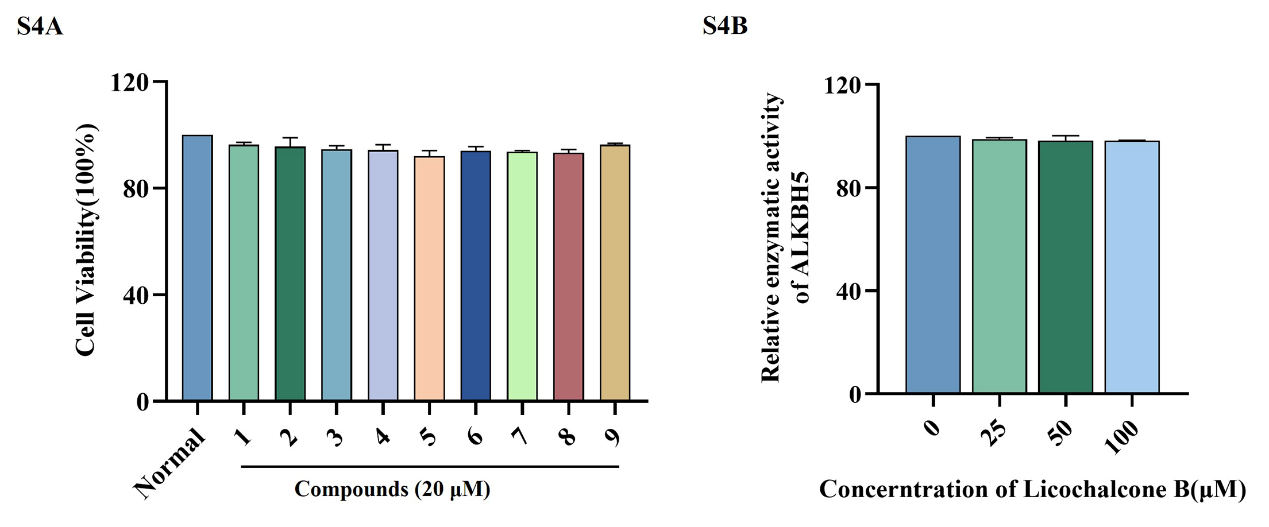


Fig S4. A: CD4+ T cells were handled with nine compounds for a duration of 48 h, and the influence of the drug on cell viability was evaluated utilizing a CCK-8 kit to ascertain any alterations.

B: licochalcone B inhibited the relative enzymatic activity of ALKBH5(three independent replicates).


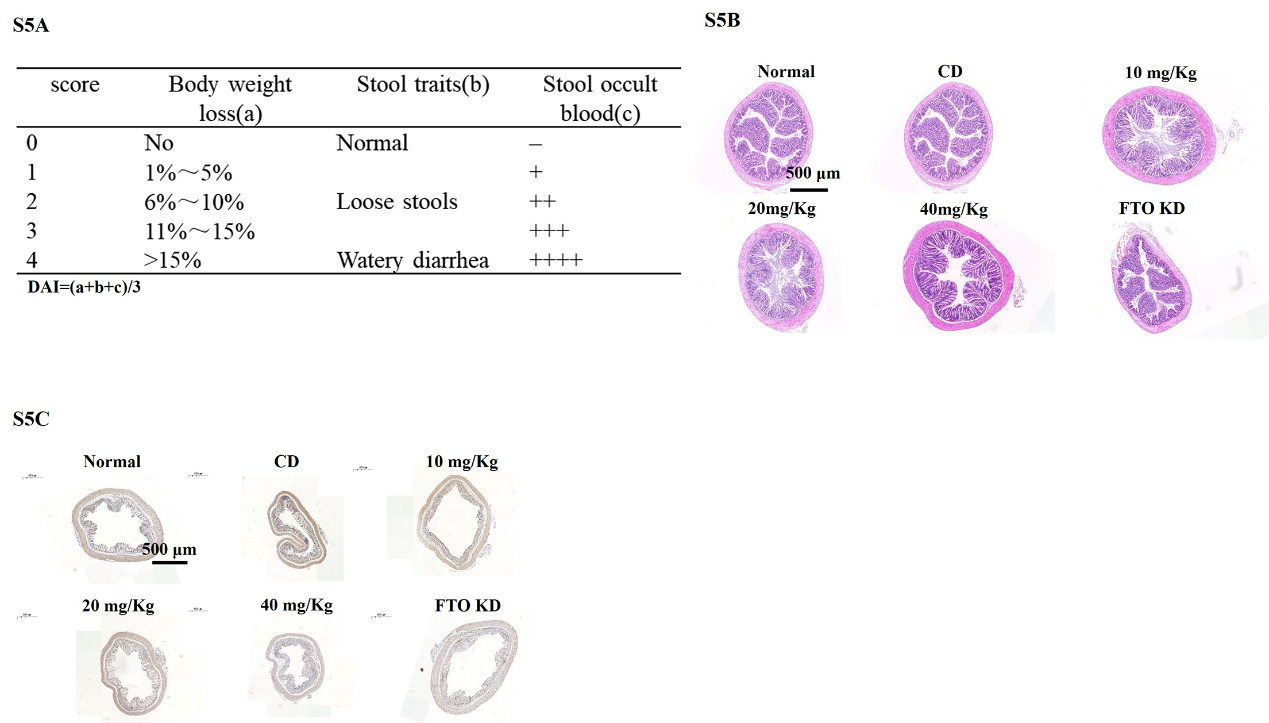


Fig S5.A: Disease activity index (DAI).

B: Representative H&E staining pictures of colon from licochalcon B and FTO knockdown treatment in TNBS-induced IBD. Scale bars, 500 μm.

C: Representative immunohistochemistry pictures of IL-17a in colon from licochalcon B and FTO knockdown treatment in TNBS-induced IBD. Scale bars, 500 μm.


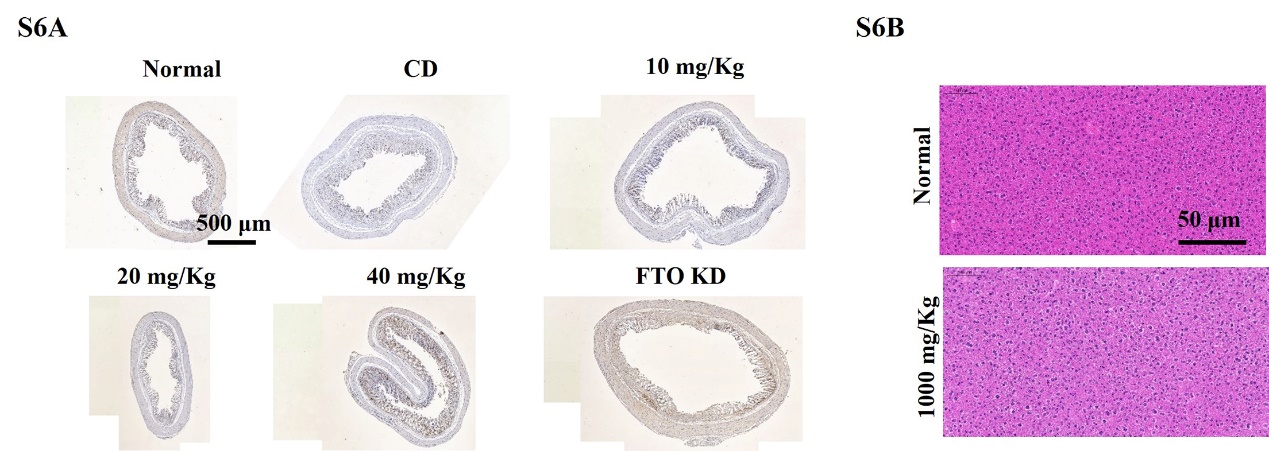


Fig S6: A: Representative H&E staining pictures of Liver injury. Scale bars, 500 μm.

B: Representative immunohistochemistry pictures of BACH2 in colon from licochalcon B and FTO knockdown treatment in TNBS-induced IBD. Scale bars, 500 μm.

# Table S1

| compound | structure |
| --- | --- |
| 1 |  |
| 2 |  |
| 3 |  |
| 4 |  |
| 5 |  |
| 6 |  |
| 7 |  |
| 8 |  |
| 9 | ·Mg2+ |

# Table S2-1: Mouse primer sequences

| Primer name  (mouse) | Sequence (5'to 3') | |
| --- | --- | --- |
| R | F |
| METTL3 | CCTCGATCTTGGAGCACTCA | GGAGCATCAGTTGCAGAAGG |
| METTL14 | CAATTCCATGGCCCTTCCTG | ACATGGAGCTACCGTATGGG |
| WTAP | GGTCAGACTTGGACTTGGGA | ACGCCTTCATCTCTTTGGGA |
| ALKBH5 | TTGAAGGTTAGCGGGATGGT | TGAGCGAGACCCTGATCTTC |
| FTO | CTCACCACGTCCCGAAACAA | GACACTTGGCTTCCTTACCTG |
| TNF-α | ACCTGACCACTCTCCCTTTG | CTCATGCACCACCATCAAGG |
| IL-1β | TGGATGCTCTCATCAGGACAG | GAAATGCCACCTTTTGACAGTG |
| IL-10 | ACACCTTGGTCTTGGAGCTT | AGAGAAGCATGGCCCAGAAA |
| GAPDH | AGACAACCTGGTCCTCAGTG | AATGTGTCCGTCGTGGATCT |
| BACH2 | CAAGTCATCTTTCGTCTGTCCA | GAGGAAGGAGTTCCGAGCC |
| IRF4 | CCTCACGATTGTAGTCCTGCTT | CCGACAGTGGTTGATCGACC |
| CLCA2 | GGCAGGTATGAAACCAGCAG | AGACTGCTCCGACTTCAACA |
| IFIH1 | CTCATTCCCGCTGTTTCCTG | GATCTGCCCTCTCCTTCCTC |
| GAL3ST2 | CTGTCTTGTGCGTCTTGAGG | TGGTTGGTTTCCTGCATGTG |
| ITLN1 | TCTTGTGCCTTTGTGTGCTC | AGTGCAGCTGAAGAGAACCT |
| CIT | TTGTCATCCTCCTGGGACAC | GCAGGAAATGACCCGGTTAC |
| SLC9A2 | TTGAAGGTTAGCGGGATGGT | TGAGCGAGACCCTGATCTTC |
| M6A PEAK-1 | GCAGGAGTCCTCCAGATTGT | CAGTTTGCCTACACTGCCAA |
| M6A PEAK-2 | ACGCGAGCTGGTACTTCTTA | GTACCCACAGACACCAAGGA |
| M6A PEAK-3 | CTCCTGGCCCCTGTCCTG | AGGTCACGGCCAGGGGCT |
| M6A-1 | AAGTCATCTTTCGTCTGTCCAAC | GGTTTGAACGGCATGTCTGTG |
| M6A-2 | GCAGGAGTCCTCCAGATTGT | CAGTTTGCCTACACTGCCAA |
| M6A-3 | CAGTTTCCGTATTTCACATTCCAAG | GTTAAACTTCCTTTTCCTGTCGATC |
| M6A-4 | ACGCGAGCTGGTACTTCTTA | GTACCCACAGACACCAAGGA |
| YTHDF1 | ATTGCTGCTAAGACTGCTGTAGTG | ACCTCTCTCATCTGGGTGTTCTTC |
| YTHDF2 | ACATTTGTCCCACCATTGCC | GCAGTTAAGACGGTGGGTTC |
| YTHDF3 | AGACGAATGTGTCGCAGTTG | TTTCAGTGTCAACGGCAGTG |
| IL-17a | ATGAGTTTTTCCCTTATGGGGAC | GCTGGAAGTTGGACACCTCAA |

# Table S2-2: Human primer sequences

| Primer name  (human) | Sequence (5'to 3') | |
| --- | --- | --- |
| R | F |
| FTO | TGTGCAGTGTGAGAAAGGCTT | ACTTGGCTCCCTTATCTGACC |
| BACH2 | CCTGAGTGATCCCCTTGTCAAAA | AAGGTCTCTGTTCAGCATAACG |
| YTHDF1 | TTGTTTCGACTCTGCCGTTC | CCAGGAGGTGCCCTTAGAAA |
| YTHDF2 | AGCAGCATCCAGTCTCTTGT | TGGAGAAGCTTCGGTCCATT |
| YTHDF3 | GAGCCTTTACCACTGACCCT | GCAGCACCTAAACCAACCTC |
| GAPDH | GGCTGTTGTCATACTTCTCATGG | GGAGCGAGATCCCTCCAAAAT |

# Table S3: The clinical features of the patients

| age | sample | pathology |
| --- | --- | --- |
| 49 | normal | polyp of colon |
| 50 | normal | polyp of colon |
| 57 | normal | polyp of colon |
| 37 | CD | Chronic mucositis; granulomas |
| 31 | CD | Chronic mucositis; granulomas |
| 18 | CD | Chronic mucositis; granulomas |
| 67 | CD | Chronic mucositis; granulomas |

# Table S4: The primers of siRNA transfection

| name | sequence（5’ to 3’) | Sequence (3’ to 5’) |
| --- | --- | --- |
| YTHDF1（h）-si-1 | GCUCAACCGCAGUAUCAGATT | UCUGAUACUGCGGUUGAGCTT |
| YTHDF1（h）-si-2 | GUCCAUUGGAUUUCCUUATT | UAAGGAAAUCCAAUGGACGTT |
| YTHDF1（h）-si-3 | GGAGAAUAACGACAACAAATT | UUUGUUGUCGUUAUUCUCCTT |
| YTHDF2（h）-si-1 | GGUGAAGCUGCUUGGUCUATT | UAGACCAAGCAGCUUCACCTT |
| YTHDF2（h）-si-2 | AAGGACGUUCCCAAUAGCCAATT | UUGGCUAUUGGGAACGUCCUUTT |
| YTHDF2（h）-si-3 | UUCGGUCCAUUAAUAACUAUATT | UAUAGUUAUUAAUGGACCGAATT |
| YTHDF3（h）-si-1 | GCCUCAGCCAUUAAUUCAATT | UUGAAUUAAUGGCUGAGGCTT |
| YTHDF3（h）-si-2 | GGGCAAAUUUGAAGUUAAATT | UUUAACUUCAAAUUUGCCCTT |
| YTHDF3（h）-si-3 | UAAGUCAAAGAAGACGUAUUATT | UAAUACGUCUUCUUUGACUUATT |

# Table S5: The shRNAs targeting human FTO in Stable Cell Line

| serial number | name | sequence（5’ to 3’) |
| --- | --- | --- |
| FTOKD1 | LV3-FTO-homo-399 | GGAGCTCCATAAAGAGGTTCA |
| FTOKD2 | LV3-FTO-homo-610 | GCTGAAATAGCCGCTGCTTGT |
| FTOKD3 | LV3-FTO-homo-811 | GCAGCATACAACGTAACTTTG |

# Table S6: Antibodies in Flow cytometry

| Antibody | Catalog no. | Company |
| --- | --- | --- |
| anti-mouse  IL-17A | 506903 | Biolegend |
| Recombinant  Mouse IL-6 | 575702 | Biolegend |
| Purified anti-mouse  IFN-γ | 505834 | Biolegend |
| Purified anti-mouse  IL-4 | 504122 | Biolegend |
| Recombinant Murine  IL-1β | 211-11B-10UG | Biolegend |
| CD25 | 101910 | Biolegend |
| CD3 | 100204 | Biolegend |
| CD45.2 | 109830 | Biolegend |
| CD4 | 100540 | Biolegend |
| FOXP3 | 126404 | Biolegend |
| CD44 | 103012 | Biolegend |
| CD69 | 104507 | Biolegend |

# 1H NMR of compound licochalcon B


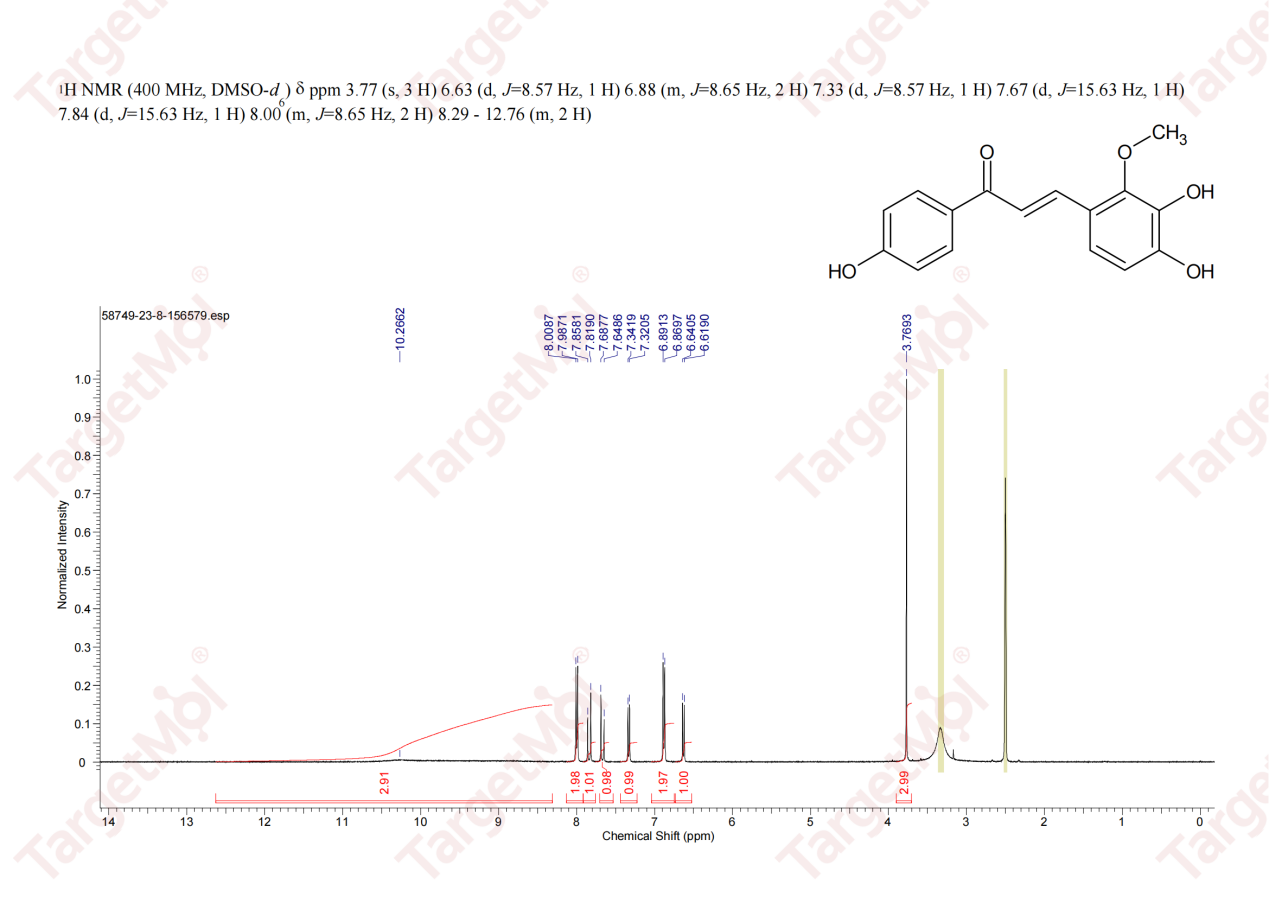


# Certificate of Analysis of compound licochalcon B


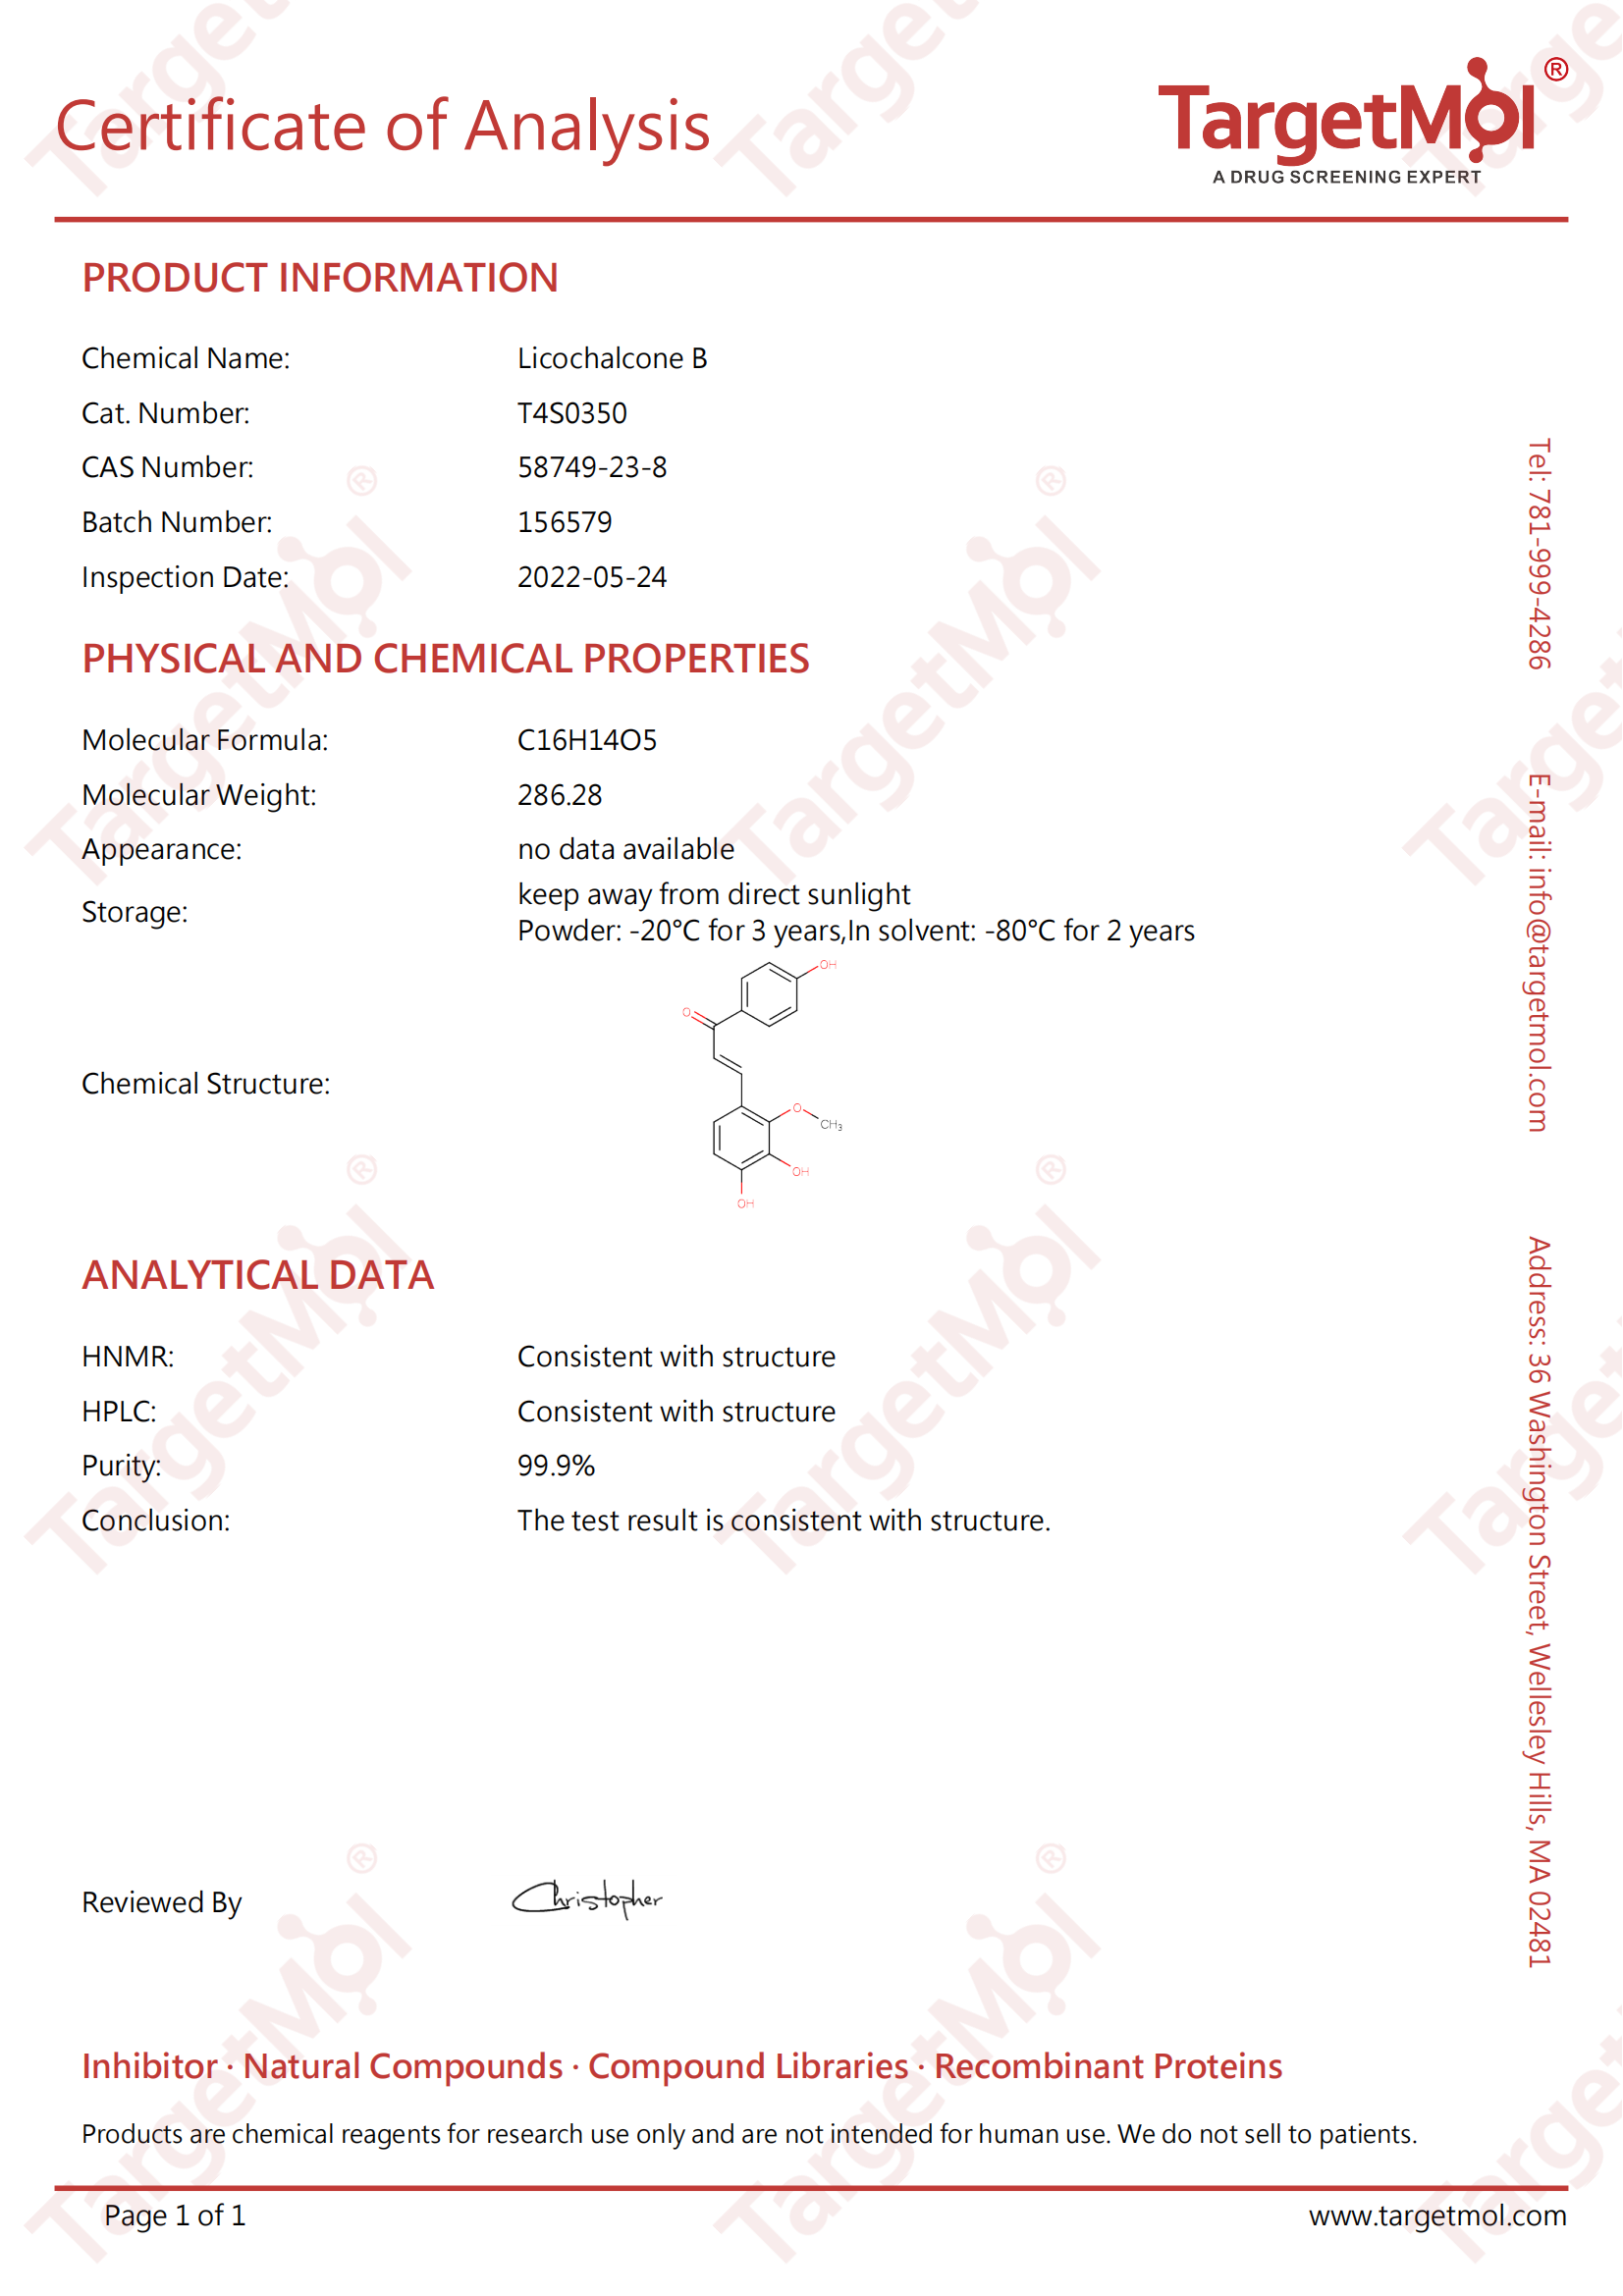


# HPLC of compound licochalcon B


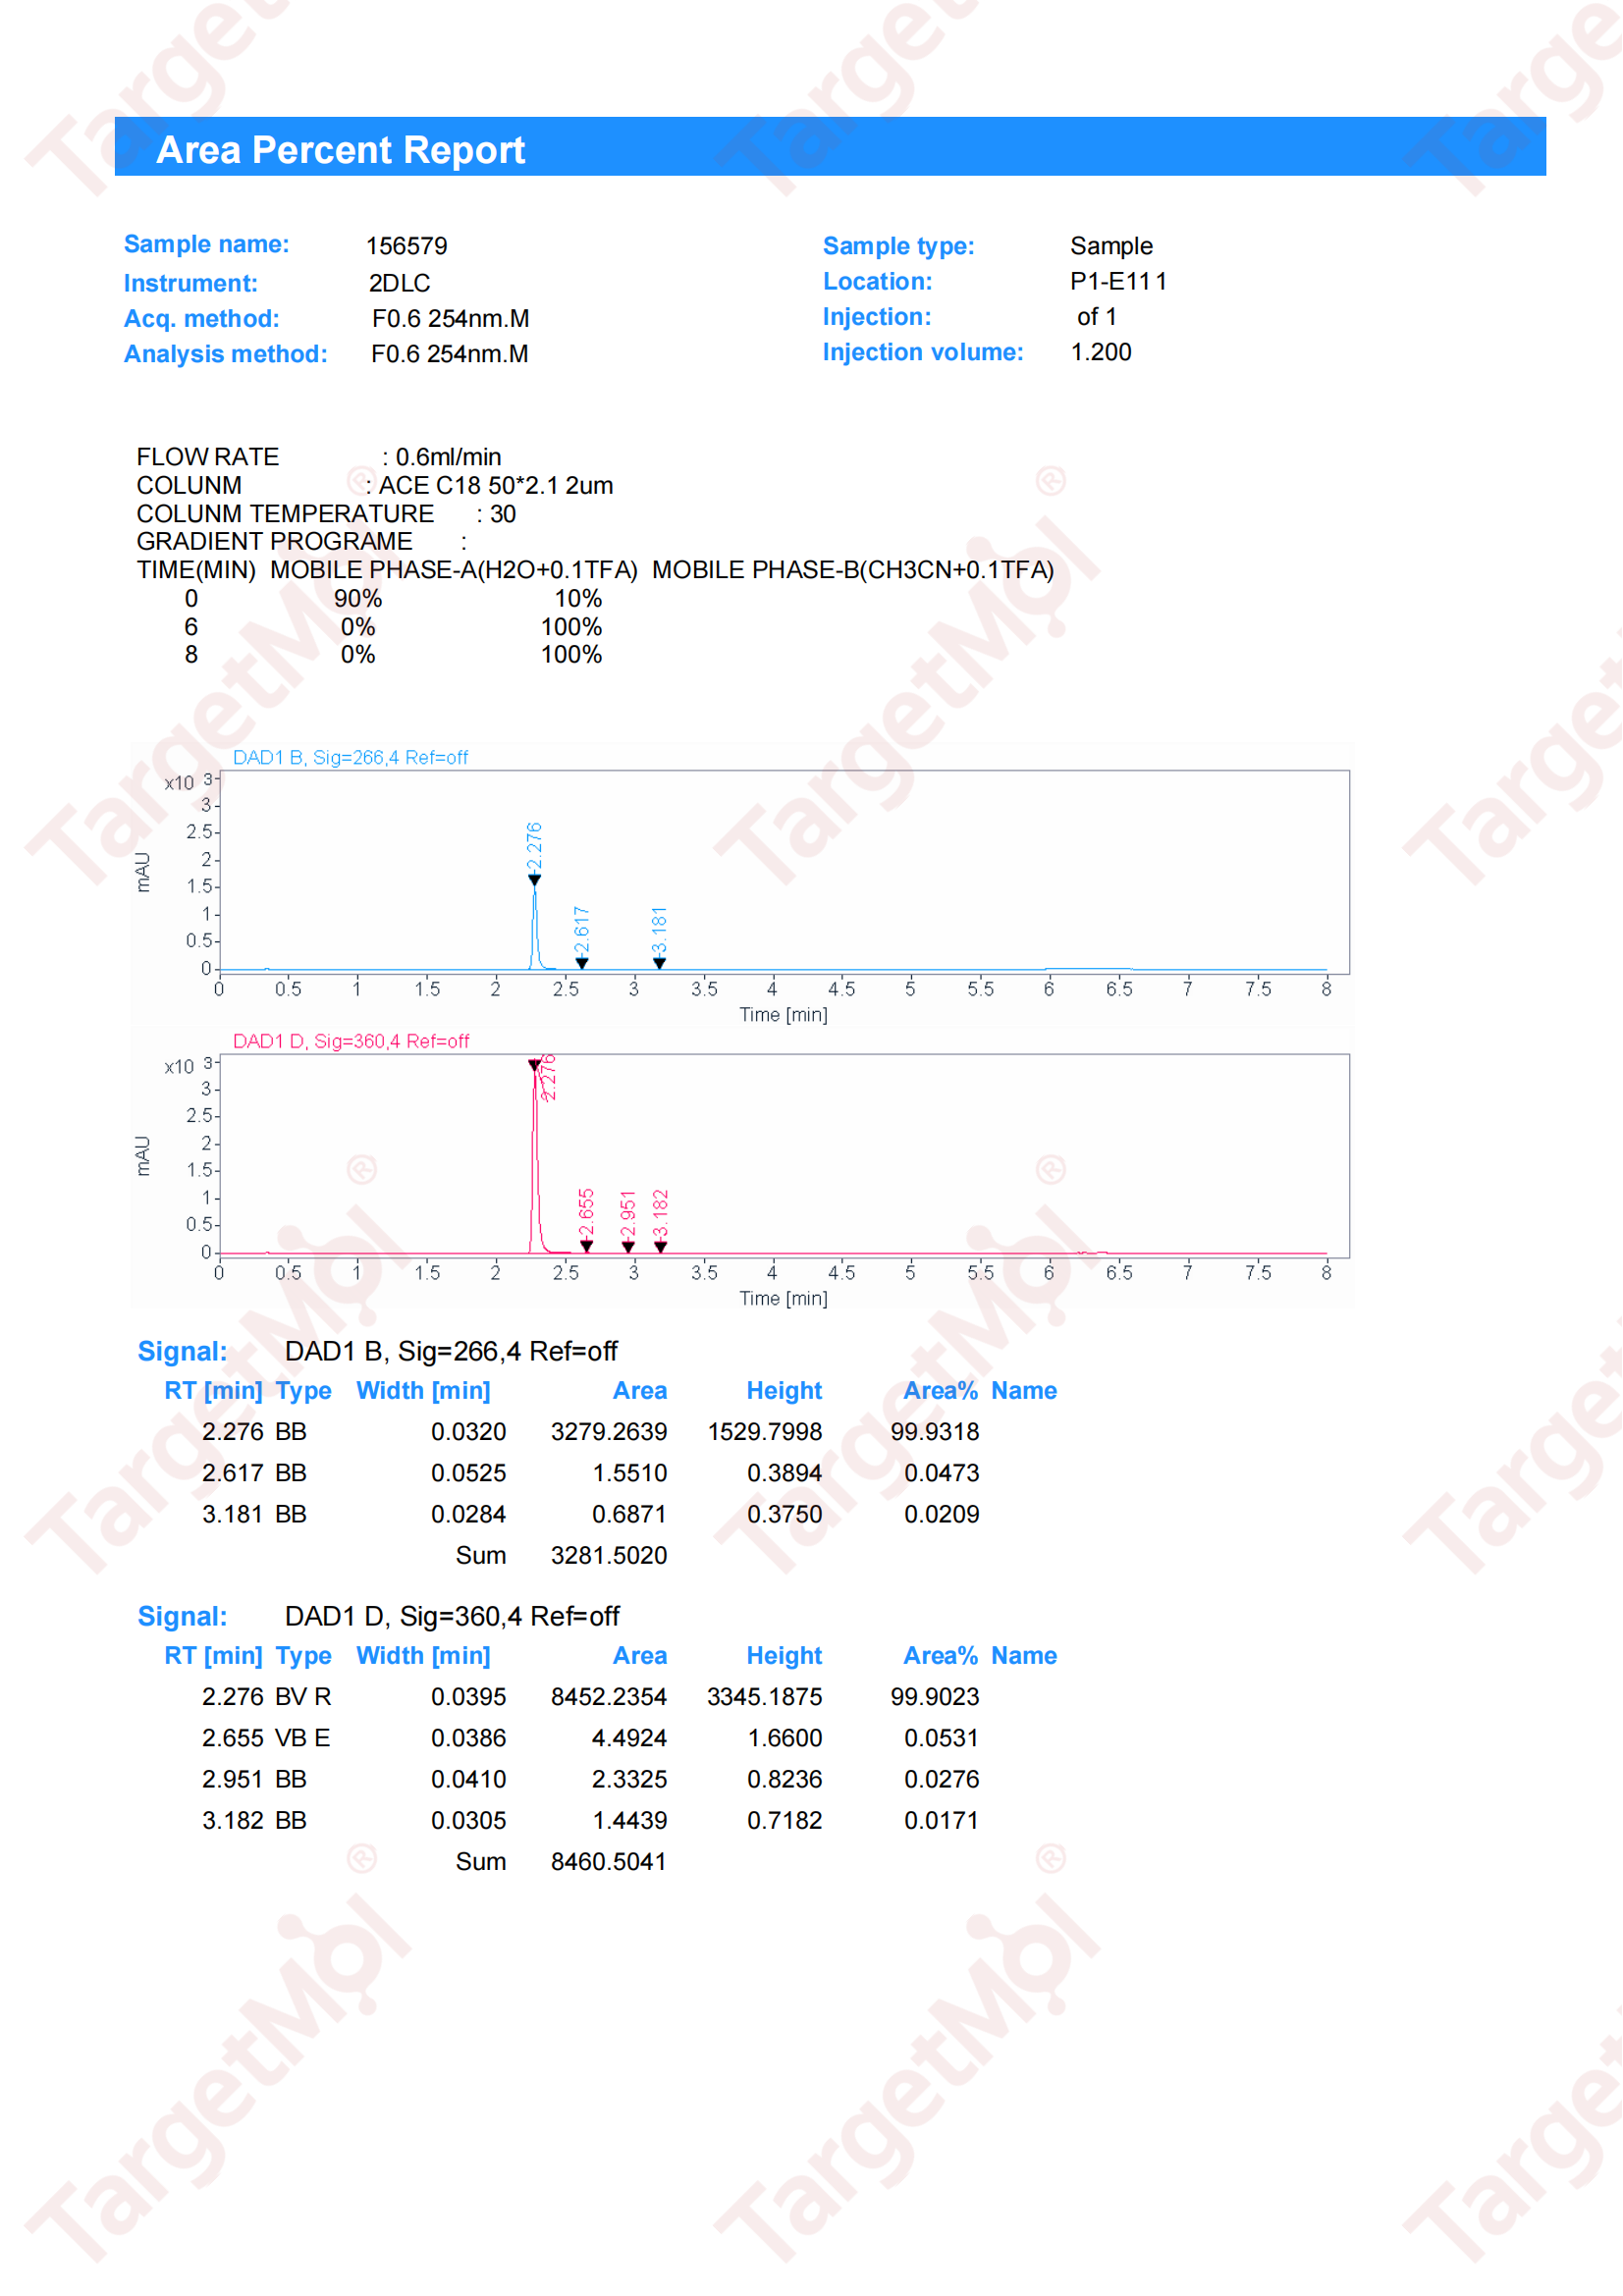

Supplement: Supplementary file 1 [file 06360a582757a1d45f145bf2.docx]
